# Supplementary material for: Enhanced Expression of Thaumatin-like Protein Gene (LeTLP1) Endows Resistance to Trichoderma atroviride in Lentinula edodes
Source: MDPI journal article supplement (doi:10.3390/life11080863), 2021-08-23
Supplement: s1 [file s1]

# Supplementary Materials

## Enhanced Expression of Thaumatin-like Protein Gene (*LeTLP1*) Endows Resistance to *Trichoderma atroviride* in *Lentinula edodes*

Xiaolong Ma<sup>1,2</sup>, Xiaolin Fan<sup>1,2</sup>, Gangzheng Wang<sup>1,2</sup>, Ruiping Xu<sup>1,2</sup>, Lianlian Yan<sup>1,2</sup>, Yan Zhou<sup>1,2</sup>, Yuhua Gong<sup>1,2</sup>, Yang Xiao<sup>1,2</sup>, Yinbing Bian<sup>1,2,\*</sup>

<sup>1</sup> Institute of Applied Mycology, College of Plant Science and Technology, Huazhong Agricultural University, Wuhan 430070, China;

<sup>2</sup> Key Laboratory of Agro-Microbial Resource and Development, Ministry of Agriculture, Wuhan 430070, China;

\* Correspondence: bianyinbinghzaucn@yahoo.com (Y.b.B);

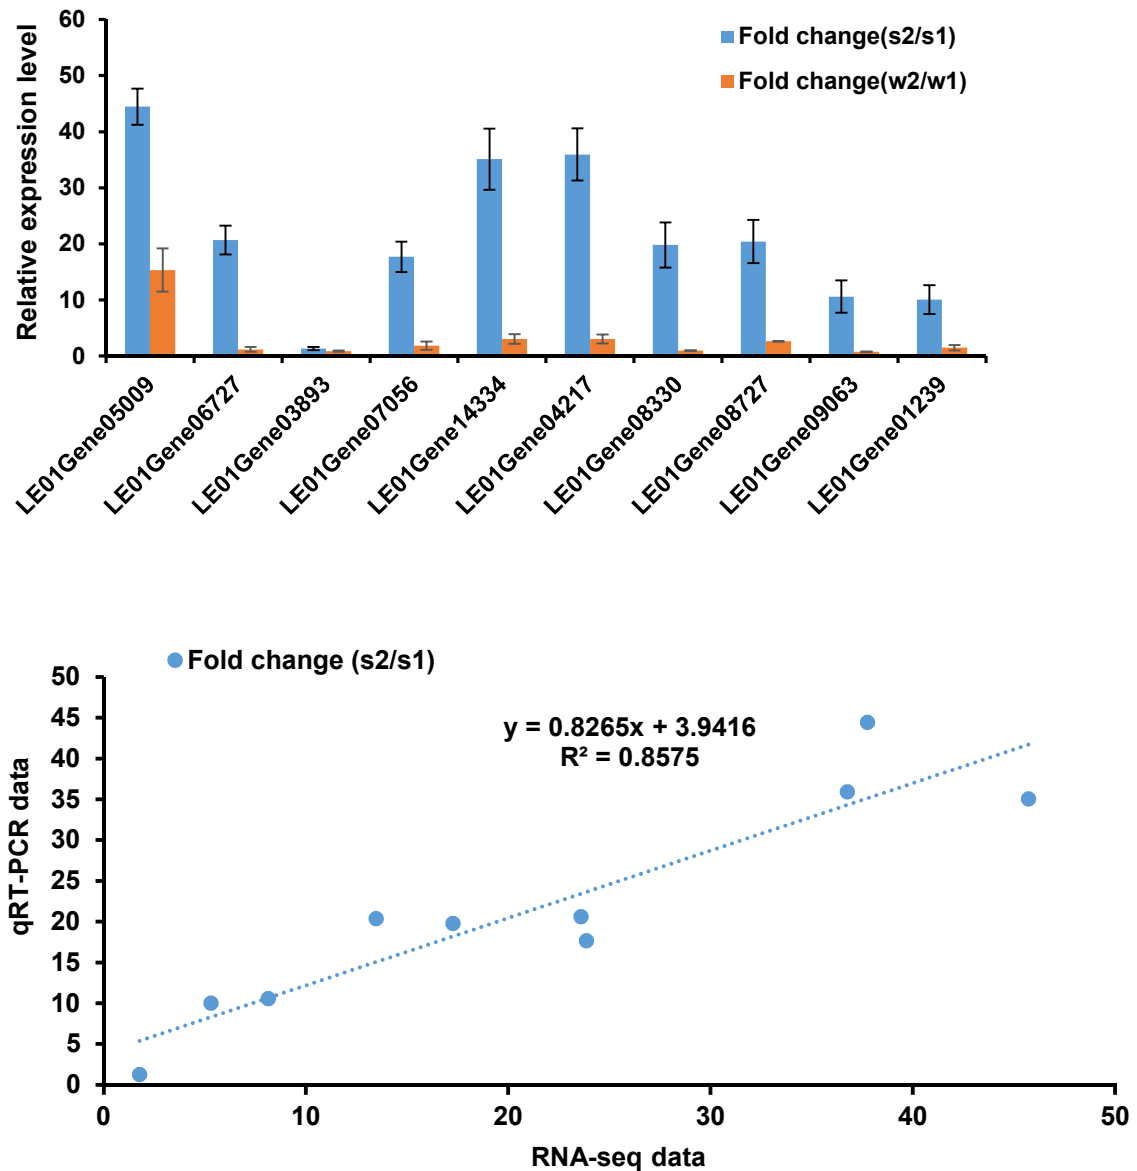

**Figure S1.** qRT-PCR results of ten selected genes and correlation between transcriptome data and real time PCR results. The resistant and susceptible *L. edodes* mycelia samples (s2, w2) were harvested after the *T. atrovire* strain 92-1 had contact with the *L. edodes* strains of 24 hours, respectively. As control, the Y3334 strain and Y55 strain of *L. edodes* was confronted with itself, respectively. The mycelia samples of resistant and susceptible *L. edodes* (s1, w1) were harvested after contact for 24 hours, respectively. s1 represents Y3334 vs. Y3334; s2 represents Y3334 vs. *T. atrovire* strain 92-1; w1 represents Y55 vs. Y55; w2 represents Y55 vs. *T. atrovire* strain 92-1.

|                    |                                                                   |     |
|--------------------|-------------------------------------------------------------------|-----|
| <i>LeTLP1</i>      | ---MMKNSIIISALFSTFVAVSARTFTVKNNCKYTVWPAIFTDMNVGTDKPSMPTGWEEA      | 57  |
| <i>LeTLP (Y55)</i> | ---MMKNSIIISALFSTFVAVSARTFTVKNNCKYTVWPAIFTDMNVGTDKPSMPTGWEEA      | 57  |
| <i>L. edodes</i>   | MKFTTAASLVSVGLV--STVDAARTFTVYNGCPFTIWPAMFTGVNQATASPAYTTGWAAN      | 58  |
| <i>LeTLP1</i>      | PGNTSTFTVPDDWQSGRIWGR*TCDFSK-PNASSCATGGCNGGLLCDEHSGTGVPPTVA       | 116 |
| <i>LeTLP (Y55)</i> | PGNTSTFTVPDDWQSGRIWGR*TCDFSK-PNASSCATGGCNGGLLCDEHSGTGVPPTVA       | 116 |
| <i>L. edodes</i>   | AYTAVSFSPDNWQAGRIWARRDCDFSVNPGPNSCLDGGCNGGLVCDPTTGTGVPASLA        | 118 |
| <i>LeTLP1</i>      | +EWTLGKNGSPDNYDVSMDG*FNIPMSVVP*TAGCQAIDC*NTDLNPNCPAQLQL-KDASGTV   | 175 |
| <i>LeTLP (Y55)</i> | EWTLGKNGSPDNYDVSMDG*FNIPMSVVP*TAGCQAIDC*NTDLNPNCPAQLQL-KDASGTV    | 175 |
| <i>L. edodes</i>   | EFTLSGAGGLDYFDISFVDGYNLPISITNNVNCPAPICAVDLGPNCAPLAGPFDSTGFP       | 178 |
| <i>LeTLP1</i>      | * * *VGCKSACDANLDGDPQNSPNCCSGSHNVPATCPPSGVQFYDYFKNGCKNAYAYAYDESSK | 235 |
| <i>LeTLP (Y55)</i> | * * *VGCKSACDANLDGDPQNSPNCCSGSHNVPATCPPSGVQFYDYFKNGCKNAYAYAYDESSK | 235 |
| <i>L. edodes</i>   | * * *VGCKSACDANLDGQQNSPNCCSGQYDTPATCPVSGVEYYTYFKDACPDAYAYAYDESSE  | 238 |
| <i>LeTLP1</i>      | TALW*TCSTQNADYAVTF*CP--                                           | 255 |
| <i>LeTLP (Y55)</i> | TALW*TCSTKNADYAVTF*CP--                                           | 255 |
| <i>L. edodes</i>   | SALWTCADSLNADY*ITFCPPA                                            | 260 |

**Figure S2.** Alignment of the amino acid sequences of *LeTLP1* (Y3334), *LeTLP* (Y55), and *L. edodes* TLP(GenBank: AB244759). Dashes in the sequence represent the introduction of a single amino acid gap. Conserved Cys are indicated with an asterisk, and conserved acidic amino acids in the acidic cleft are indicated with a +.

**Table S1** Cultivated and wild strains of *Lentinula edodes* used in this study.

| Strain number | Strain name   | Origin      | Main agronomic traits |
|---------------|---------------|-------------|-----------------------|
| c2            | S605          | Shanghai    | S,F,M and MLa         |
| c6            | Cr04          | Sanming-1   | S, F, MH and Ea       |
| c9            | L12           | Sanming     | W, D, ML              |
| c10           | L135          | Sanming     | S, F or D, L and La   |
| c20           | L856          | Sanming     | S, F or D, ML and Ea  |
| c23           | S602          | Shanghai    | S, F, M and La        |
| c27           | Guangxiang-51 | Guangdong   | W, D, ML              |
| c28           | Hunong-1      | Shanghai    | W, D, M               |
| c31           | Huaxiang-8    | Wuhan       | S, F, M and Ea        |
| c42           | Qingke-20     | Qingyuan    | S, D, ML and MLa      |
| c47           | Qiu-6         | Wuhan       | S, D, M and Ea        |
| c48           | Rifeng-34     | Henan       | W, D, L               |
| c49           | Senyuan-10    | Yichang     | W or S, D, L and MLa  |
| c50           | Senyuan-1     | Yichang     | W, D, L               |
| c51           | Senyuan-2     | Yichang     | W or S, D, L and La   |
| c64           | 430           | Wuhan       | S, D, ML and Ea       |
| c67           | 908           | Henan       | S, D, ML and MLa      |
| c82           | 868           | Zhejiang    | S, F, ML and Ea       |
| c85           | Xiangjiu      | Guangdong   | W, D, M               |
| c87           | Yuhua-2       | Biyang      | S, D, ML and Ea       |
| c88           | Yuhua-4       | Biyang      | S, D, ML and Ea       |
| Y1            | EFISAAS0229   | Jingdong    | -                     |
| Y5            | EFISAAS0351   | Jingdong    | -                     |
| Y7            | 00167         | Yaoan       | -                     |
| Y8            | 00168         | Xianggelila | -                     |
| Y11           | ACCC50786     | Huangshan   | -                     |
| Y14           | GAN059        | Kang couty  | -                     |
| Y29           | HUB039        | Shennongjia | -                     |
| Y30           | HUB040        | Shennongjia | -                     |
| Y37           | HUB091        | Changyang   | -                     |
| Y39           | HN002         | Chenzhou    | -                     |
| Y51           | SHX044        | Liuba       | -                     |
| Y55           | NO.41         | Xiushui     | -                     |
| Y70           | LeQc743s      | Qingchuan   | -                     |
| Y76           | LeWs735       | Dechang     | -                     |
| Y78           | LHLy14        | Huili       | -                     |
| Y79           | LHLy217       | Huili       | -                     |
| Y84           | LMLH14        | Mianning    | -                     |
| Y88           | LMLH36        | Mianning    | -                     |
| Y89           | LMLH52        | Mianning    | -                     |

|       |           |          |   |
|-------|-----------|----------|---|
| Y91   | LMLH59    | Mianning | - |
| Y94   | LMLH116   | Mianning | - |
| Y100  | LMLHA18   | Mianning | - |
| Y104  | LMLHA36   | Mianning | - |
| Y110  | LMLHL22   | Mianning | - |
| Y111  | LMLHL26   | Mianning | - |
| Y113  | LMLHL210  | Mianning | - |
| Y118  | LMYP62    | Miyi     | - |
| Y121  | LPG82     | Puge     | - |
| Y234  | YAASM234  | Nanhua   | - |
| Y358  | YAASM358  | Chuxiong | - |
| Y366  | YAASM366  | Chuxiong | - |
| Y1515 | YAASM1515 | Yangbi   | - |
| Y1518 | YAASM1518 | Yangbi   | - |
| Y3334 | YAASM3334 | Longling | - |
| Y3353 | YAASM3353 | Jingdong | - |

---

S for sawdust cultivation; W for woodlog cultivation; W or S both for sawdust and wood log cultivations; F (fresh fruiting body production type), fruiting body mostly sold in fresh form in the market; D (dried fruiting body production type), fruiting body mostly sold in dried form in the market; For D, fruiting body sold both in fresh and dried forms in the market; H (high temperature type), fruiting body formation at 8–32°C; MH (middle-high temperature type), fruiting body formation at 15–28°C; M (medium-temperature type), fruiting body formation at 10–25°C; ML (middle-low temperature type), fruiting body formation at 8–23°C; L (low temperature type), fruiting body formation at 5–20°C; Ea (early maturing type), duration from inoculation to fruiting body formation is 65–75 days; MLa (middle-late maturing type), duration from inoculation to fruiting body formation is 90–150 days; La (late maturing type), duration from inoculation to fruiting body formation is 160–200 days . . .

**Table S2** Primers used for real time quantitative PCR.

| Gene numbers     | Gene name                                                  | Forward primer<br>sequence(5'-3') | Reverse primer<br>sequence (5'-3') |
|------------------|------------------------------------------------------------|-----------------------------------|------------------------------------|
| LE01Gene01050.t2 | Actin-1                                                    | ACCACCGCTGAGC<br>GTGAAAT          | CAAGGAAGGCA<br>GGCTGGAAG           |
| LE01Gene05009    | Thaumatococcus-like protein                                | TGACTTCTCGAAG<br>CCCAACG          | TTCCGAGTGTCC<br>ATTCAGCAAC         |
| LE01Gene06727    | Oligopeptide transporter<br>3                              | GAGAAACCACTC<br>GCACAGAA          | ATCCAAAGCAGC<br>TTCCGACT           |
| LE01Gene03893    | Spore germination<br>protein                               | GTATGGGCAATGG<br>CGTTCTG          | TGAGCAGCGATG<br>GTTTGACA           |
| LE01Gene07056    | lcc-3                                                      | CGACACTGATTAA<br>CGGGAACG         | CGATGGAGAAG<br>CCGTGGAA            |
| LE01Gene14334    | Cytochrome b561 and<br>DOMON domain-<br>containing protein | GCGGGTGCGGATT<br>ATGTTT           | TTGAAAGCCGTC<br>GCCTCTAA           |
| LE01Gene04217    | Probable peptidoglycan<br>endopeptidase                    | AATGAGATCGCCA<br>CCAAGAAC         | GTGCCAGGGATG<br>CAAAGCT            |
| LE01Gene08330    | lcc-1                                                      | ACGGGTAACAAA<br>GGCGACAA          | CAAGGGTCCAC<br>GCAATCCA            |
| LE01Gene08727    | Oligopeptide<br>transporter 6                              | TTCGATAGCCCT<br>CGCCTCAT          | AGCGCCAAAG<br>CAAGATAGACC          |
| LE01Gene09063    | Oligopeptide<br>transporter 2                              | GTCTTGGAAG<br>GTAGCGAGG           | CGAGCTCCCGA<br>ACTATCTGTG          |
| LE01Gene01239    | Oligopeptide<br>transporter 3                              | GCTCAATCCTTG<br>GACATTTCGT        | GGCGTCCATTC<br>CCATACCAA           |
